# Supplementary material for: Comparison of efficiency and specificity of CRISPR-associated (Cas) nucleases in plants: An expanded toolkit for precision genome engineering
Source: PubMed Central journal article supplement (PMC6392405; doi:10.1371/journal.pone.0211598), 2019-02-27
Supplement: pone.0211598.s003.pdf [file pone.0211598.s003.pdf]

### S3 Table

#### Oligonucleotide primers used to amplify genomic targets

[Underline denotes extensions for addition of adapters for preparation of Illumina libraries]

| Name                                                         | Arabidopsis Gene Model Identifier | Forward primer 5'-3'                                                       | Reverse primer 5'-3'                                                         |
|--------------------------------------------------------------|-----------------------------------|----------------------------------------------------------------------------|------------------------------------------------------------------------------|
| NbPDS – phytoene desaturase ( <i>Nicotiana benthamiana</i> ) | N/A                               | <u>TCGTCGGCAGCGTCAGATGTGTATA</u><br><u>AGAGACAGGATAAGGAATTTGCAT</u><br>AGT | <u>GTCTCGTGGGCTCGGAGATGTGTAT</u><br><u>AAGAGACAGAGGATTAAGTCCCTTT</u><br>GTCA |
| AtADH1 – alcohol dehydrogenase                               | AT1G77120                         | <u>TCGTCGGCAGCGTCAGATGTGTATA</u><br><u>AGAGACAGTTCTCTCTGTACACCG</u><br>ATG | <u>GTCTCGTGGGCTCGGAGATGTGTAT</u><br><u>AAGAGACAGTGGCTGAAGATCAGTC</u><br>ACTC |
| RPS4A family protein                                         | AT5G58420                         | TGTGATTA <del>AAAA</del> ACCGTGAGA                                         | CAAGAGAGGACACAATGGATA                                                        |
| RPS4A family protein                                         | AT5G07090                         | CTTTGAGACAATCCACATTC                                                       | TTGAAATCCAACAACATAAGA                                                        |
| RPS4A family protein                                         | AT5G37072                         | TTCAAAAAATCAGGAGACTGG                                                      | AAGACTTCTAAGTCATATAGAACA                                                     |
| Rpn2/Psmd1 subunit                                           | AT2G32730                         | TGTTGAAAGAATGCTTGAA                                                        | CATGTCGTACTCTCTGCGGT                                                         |
| Rpn2/Psmd1 subunit                                           | AT1G04810                         | TGTTGAACGAATGCTAGACA                                                       | CATGTCATATTCTCTTTGAT                                                         |
| TPR3-related                                                 | AT5G27030                         | GTTCTCTTGTGGAACGAGTA                                                       | TAATGAGTGATTTTACCAGCAT                                                       |
| AtMPK19                                                      | AT3G14720                         | TCTGTGACTTTGGACTTGCAA                                                      | CATGTGTGGGTGGTTCATTCTA                                                       |
| AtMPK18                                                      | AT1G53510                         | TTGTGACTTTGGATTGGCTA                                                       | GGCACAACCTATACTTATACAAG                                                      |
| ZFN3                                                         | AT5G16540                         | GTAATTTGATCACCCGATG                                                        | GGCGAATCAGATTAGATCAGA                                                        |
| methyltransferase                                            | AT5G10620                         | AGAAACTGCTTTATGATTGATAA                                                    | GCAGTTTCTTTGTACACGATAG                                                       |
| methyltransferase                                            | AT5G10605                         | AAGCTCTCAACAGGAAATCA                                                       | ACTTTCGACTTACAGTAACAGT                                                       |
| AGL104                                                       | AT1G22130                         | AAGTTTGTAGGTTACAACAACA                                                     | CATAGTAGATGCTTCATACGA                                                        |
| AtCPK34                                                      | AT5G19360                         | TGTGGAGCTTAAAGGAGCGT                                                       | TCTGGTCCACTTCTCTCTCT                                                         |
| CPK17                                                        | AT5G12180                         | TGTGGAGCTTAAAGGGGCTT                                                       | GTCACGCAGGGTTTACAACG                                                         |
| UUAT1                                                        | AT5G04160                         | GCATCGTCTTTTGTGCTTCCG                                                      | TTAAGAGAATTGAGAACAGAACA                                                      |
| Nucleotide-sugar transporter family protein                  | AT3G10290                         | CATTGTCTTTTGTGCCTCTG                                                       | TTTCATTACGAGAATTGTAGAGAA                                                     |
| Hypothetical protein                                         | AT1G68250                         | CTCTCCATATCACTCTTCAACTA                                                    | TACATAATTACCTTTTCCGTGCT                                                      |
| AtCas6                                                       | AT5G04770                         | CAACAATGGTGGTCACTCTT                                                       | TTAAAATTTTCAGAAAACCGTG                                                       |
| CAT7                                                         | AT3G10600                         | ATACCGGAACCACGACGGAGACACC<br>T                                             | ATAAACGCCGAAACTCGCCTGTA                                                      |
| AtIPCS1                                                      | AT3G54020                         | CGCCTTCTTAGTTGTAAGGACTCT                                                   | TTACAAGCTATTATTTTGTCCGG                                                      |
| ATIPCS2                                                      | AT2G37940                         | GCATTCTTAGTTGTAAGTTCCTGC                                                   | TGTGATTTACAGAGAAGCCT                                                         |
| Flavin-binding monooxygenase family protein                  | AT1G62600                         | AGTATATAGACCATGTACAATTTT                                                   | TTTCTTCTCTTTCTCCGTAGATT                                                      |
| flavin containing monooxygenase FMO GS-OX-like protein       | AT1G63390                         | AGTATATAGATTATGTGAAATTC                                                    | CAAACCGAATCATCTCCTCGA                                                        |
| flavin containing monooxygenase FMO GS-OX-like protein       | AT1G62620                         | AGTATATAGACCATGTACAATTTT                                                   | TTTCTTCTCTTTCTCCGTAGATT                                                      |
| flavin containing monooxygenase FMO GS-OX-like protein       | AT1G63370                         | AGTATATAGACCATGTACAATTTT                                                   | GGCACCTGCATTATCACCAA                                                         |
| Protein kinase superfamily protein                           | AT1G73460                         | TCAGCGAACTGGAGAGAGTG                                                       | CTGCCAAACAGGCTCATCAC                                                         |
| Protein kinase superfamily protein                           | AT1G73450                         | TCAGAGAACTGGAAAGAGCG                                                       | CTGCCAAACAGGCTCAGTCC                                                         |
| ENTH/ANT                                                     | AT1G14910                         | TCCTTACTGCTACATTCACG                                                       | GTAACAAACAAGTTATTATCTGAT                                                     |
| ENTH/ANT                                                     | AT2G01600                         | TTAGTGTTTCTCCTTCATTTGTG                                                    | TCAAAGTTGTCCACAGTTAGT                                                        |
