# Supplementary material for: Comparison of efficiency and specificity of CRISPR-associated (Cas) nucleases in plants: An expanded toolkit for precision genome engineering
Source: PubMed Central journal article supplement (PMC6392405; doi:10.1371/journal.pone.0211598), 2019-02-27
Supplement: pone.0211598.s004.pdf [file pone.0211598.s004.pdf]

**S1 Fig.** Chromatograms and gel images of Cas-induced targeted mutations and deletions. For each target the PAM is shown in blue underline and for each candidate off-target mismatches to the spacer are shown in red. The expected cleavage site is marked with a vertical red line (|) in the target and with a red arrow ▲ in the chromatogram.

AT5G58420

spacer : TGGCAAAGGAACAAAGCCAT

Target : GGGTAATGTGTACACCATTTGGCAAAGGAACAAAGCCATGGGTGTCTCTTCCAAGGGCAAAGGTATCAA

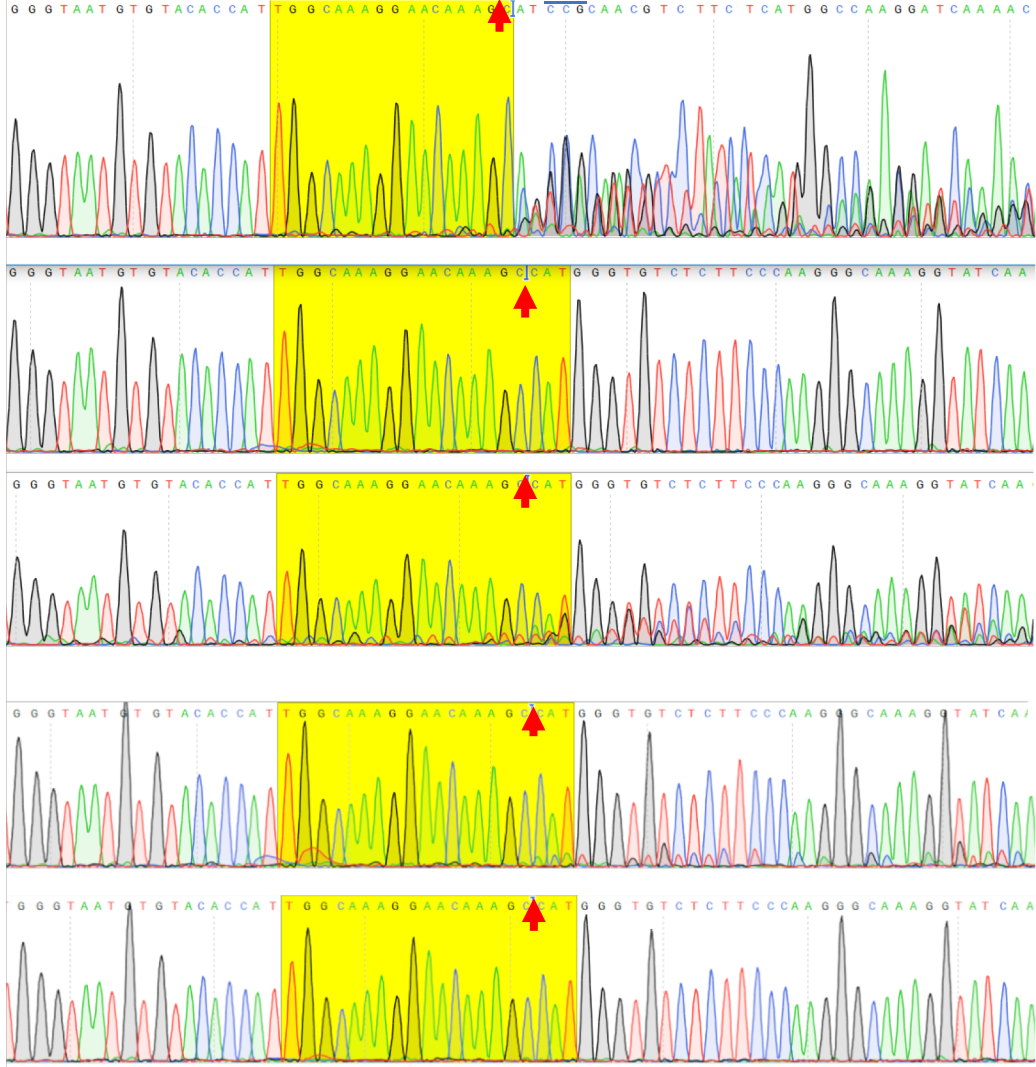

Cas9  
Mutation at target

SpCas9 Y

xCas9 3.7 N

eCas9 1.0 Y

eCas9 1.1 Y

none N

Direction of sequencing reads →

AT5G07090

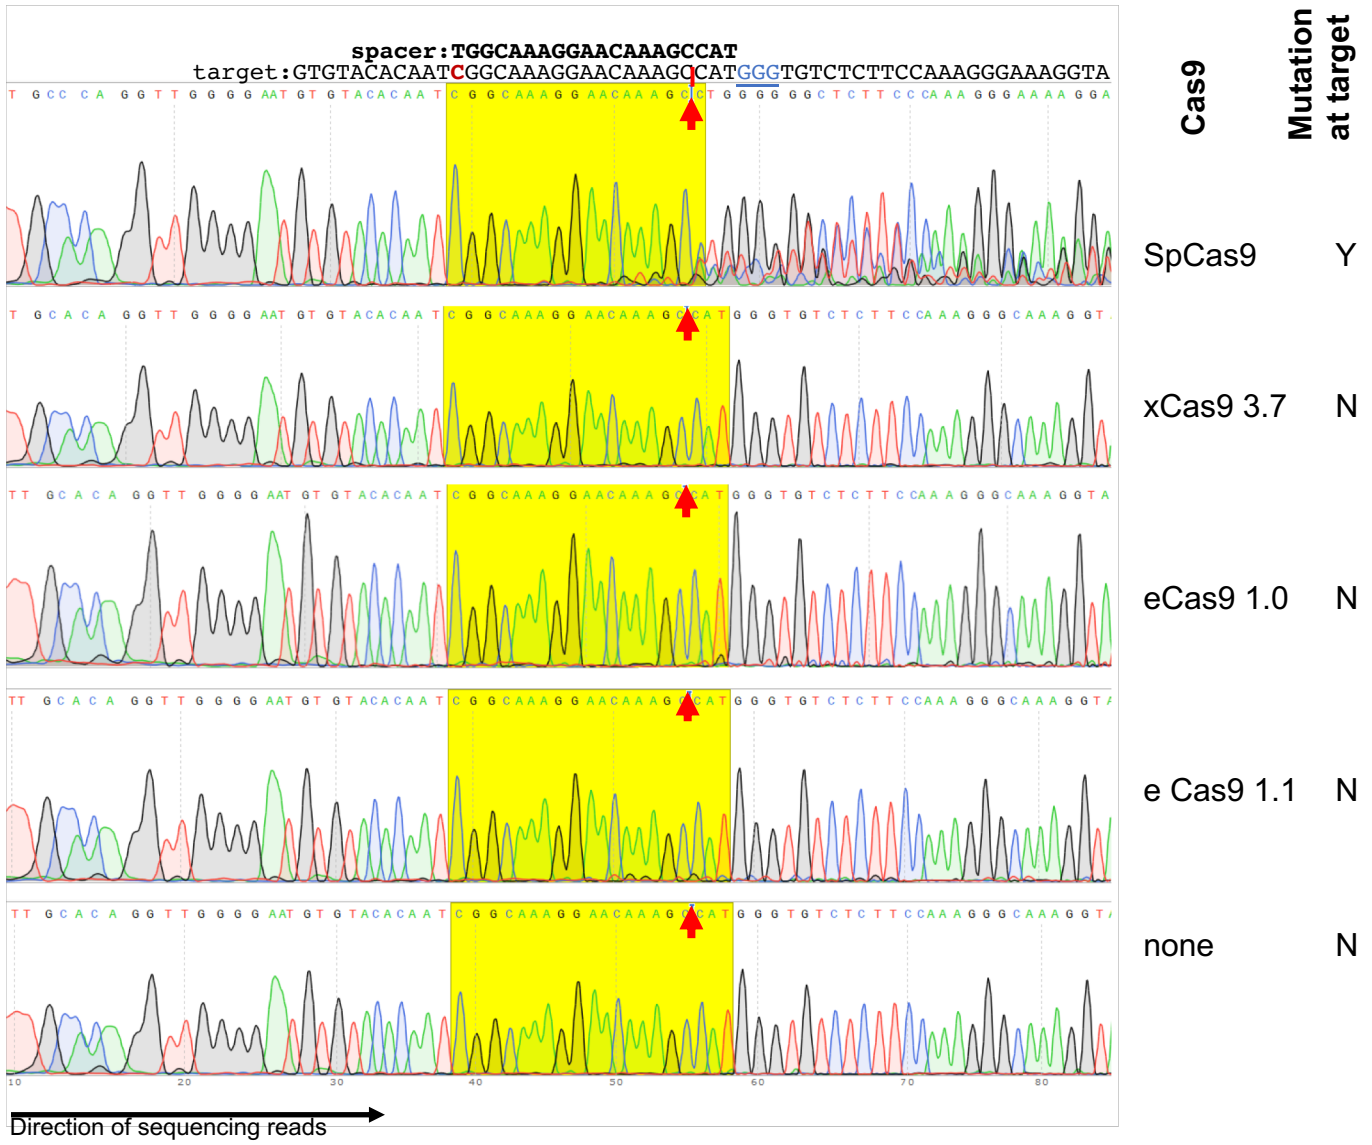

AT5G37072 b

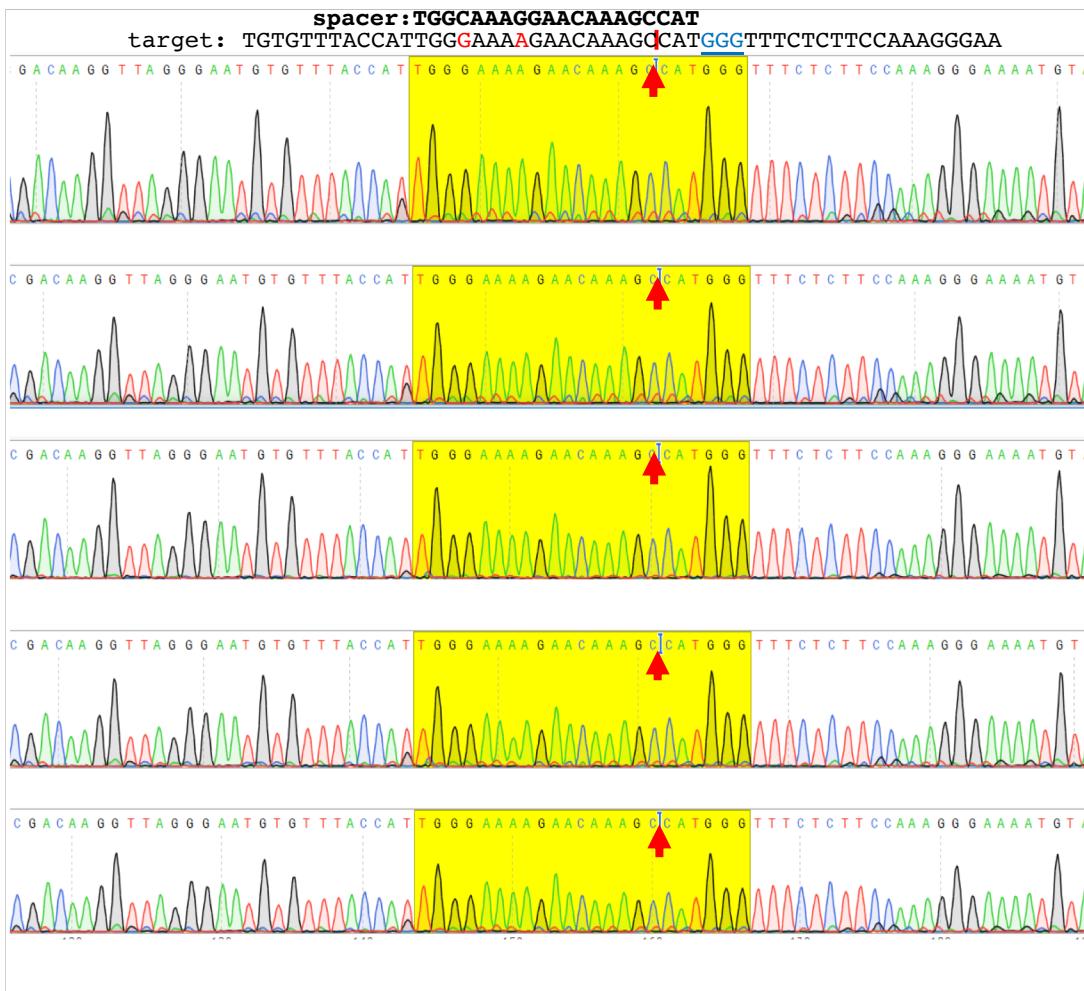

Cas9  
 Mutation  
 at target

SpCas9 N

xCas9 3.7 N

eCas9 1.0 N

eCas9 1.1 N

none N



AT2G32730

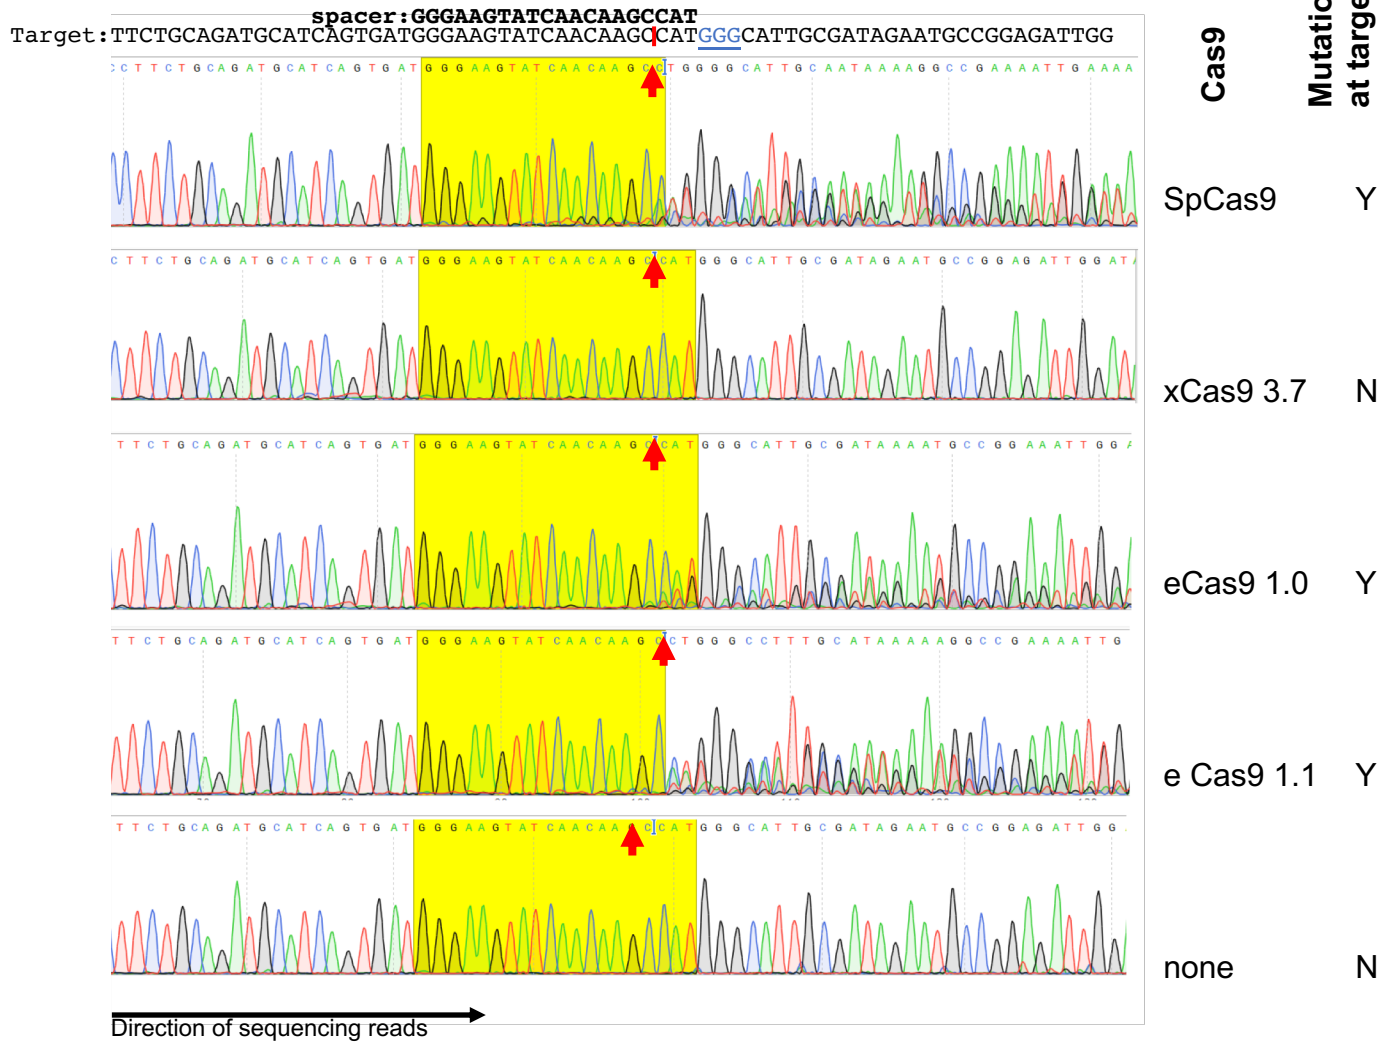

AT1G04810

spacer : **GGGAAGTATCAACAAGCCAT**  
 Target : TTTATAGATGTATCACTGACGG**AAAGTATCAACAAGCCAT**GGGCATTGCGATAGAATGCCGGAGATTGG

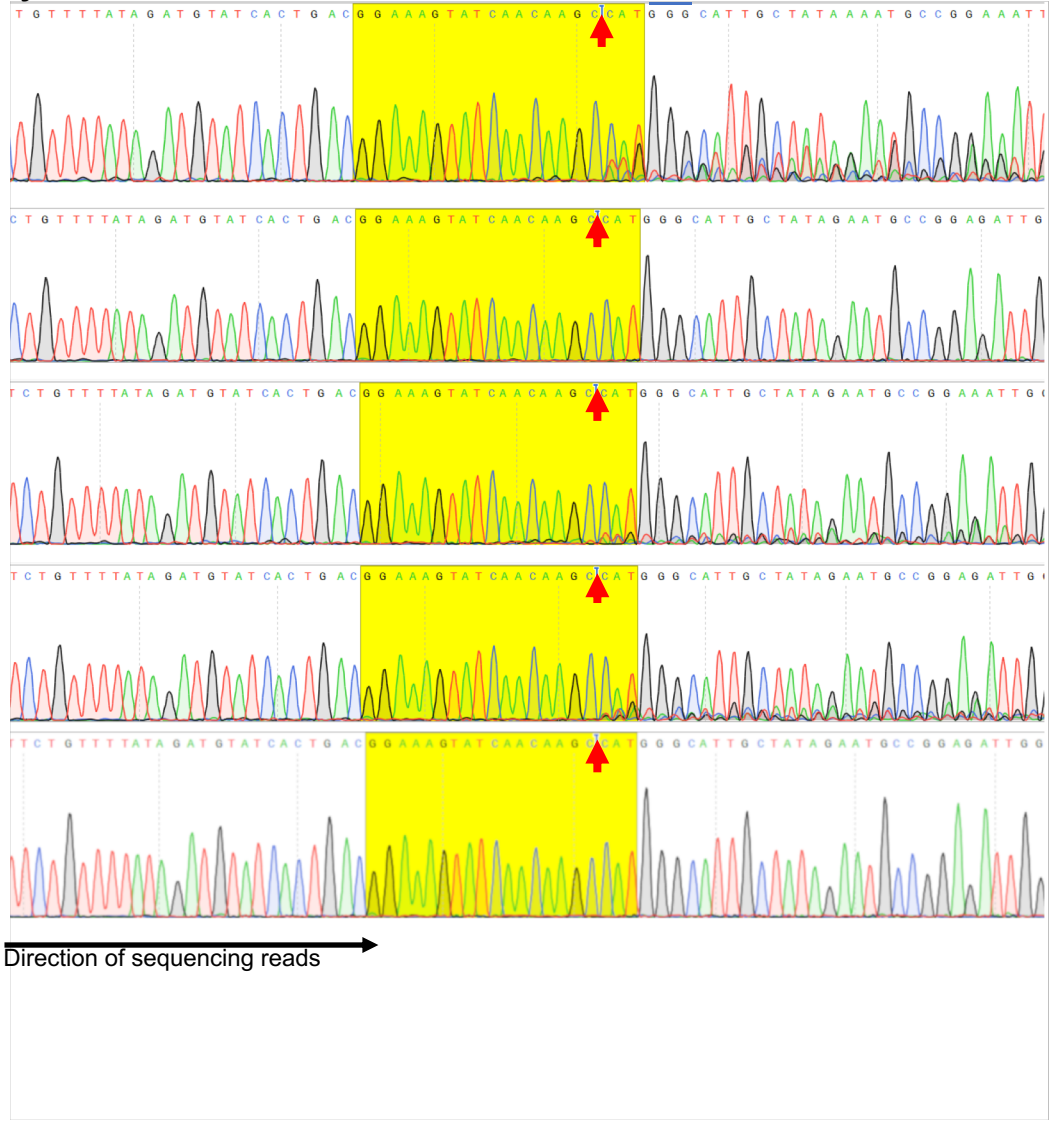

| Cas9       | Mutation at target |
|------------|--------------------|
| SpCas9     | Y                  |
| xCas9 3.7  | N                  |
| eCas9 1.0  | Y                  |
| e Cas9 1.1 | Y                  |
| none       | N                  |

AT5G27030

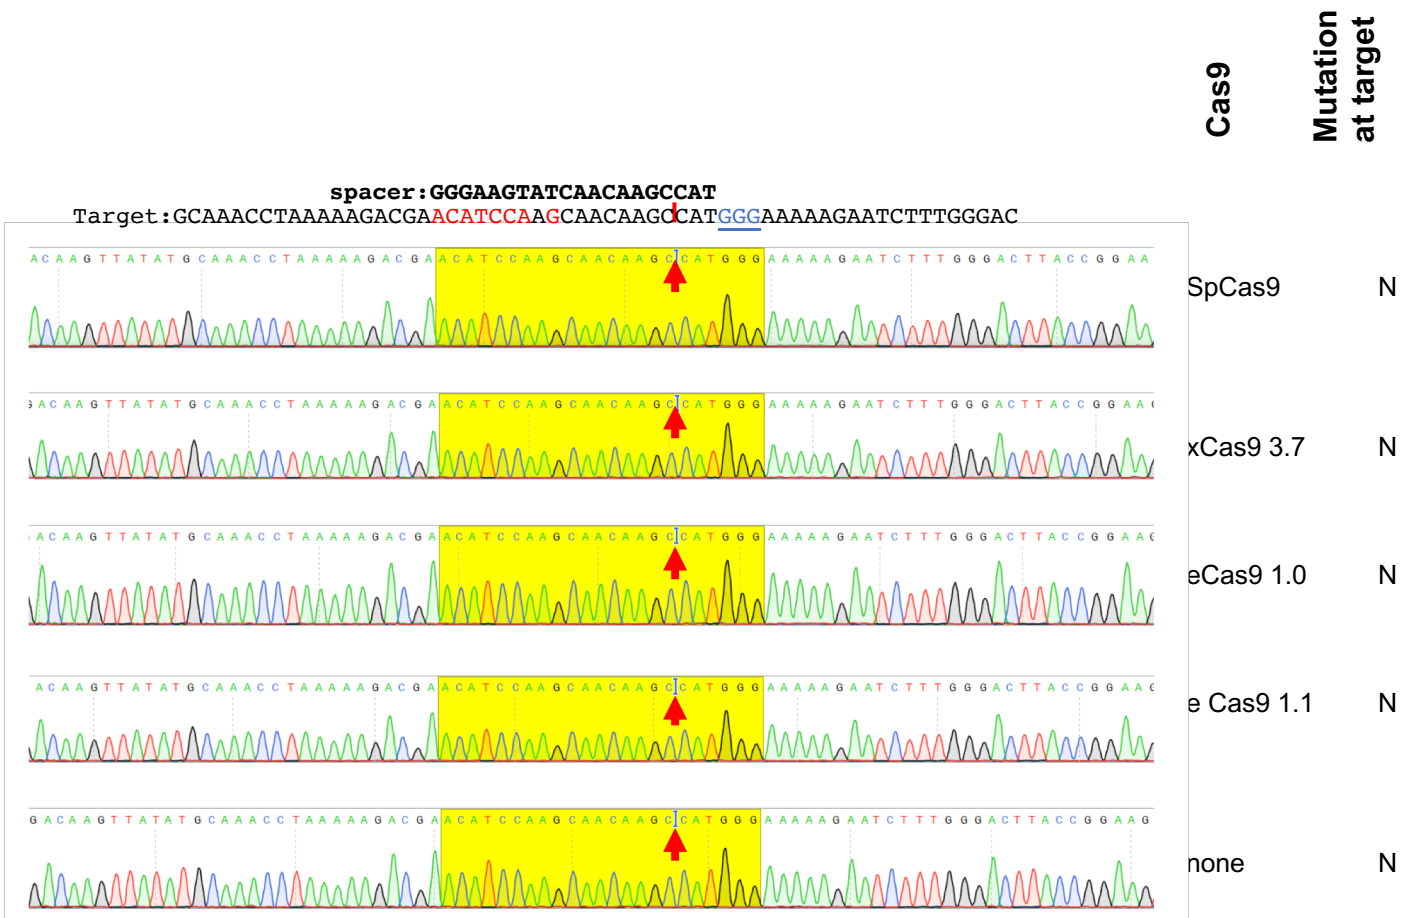

AT3G14720

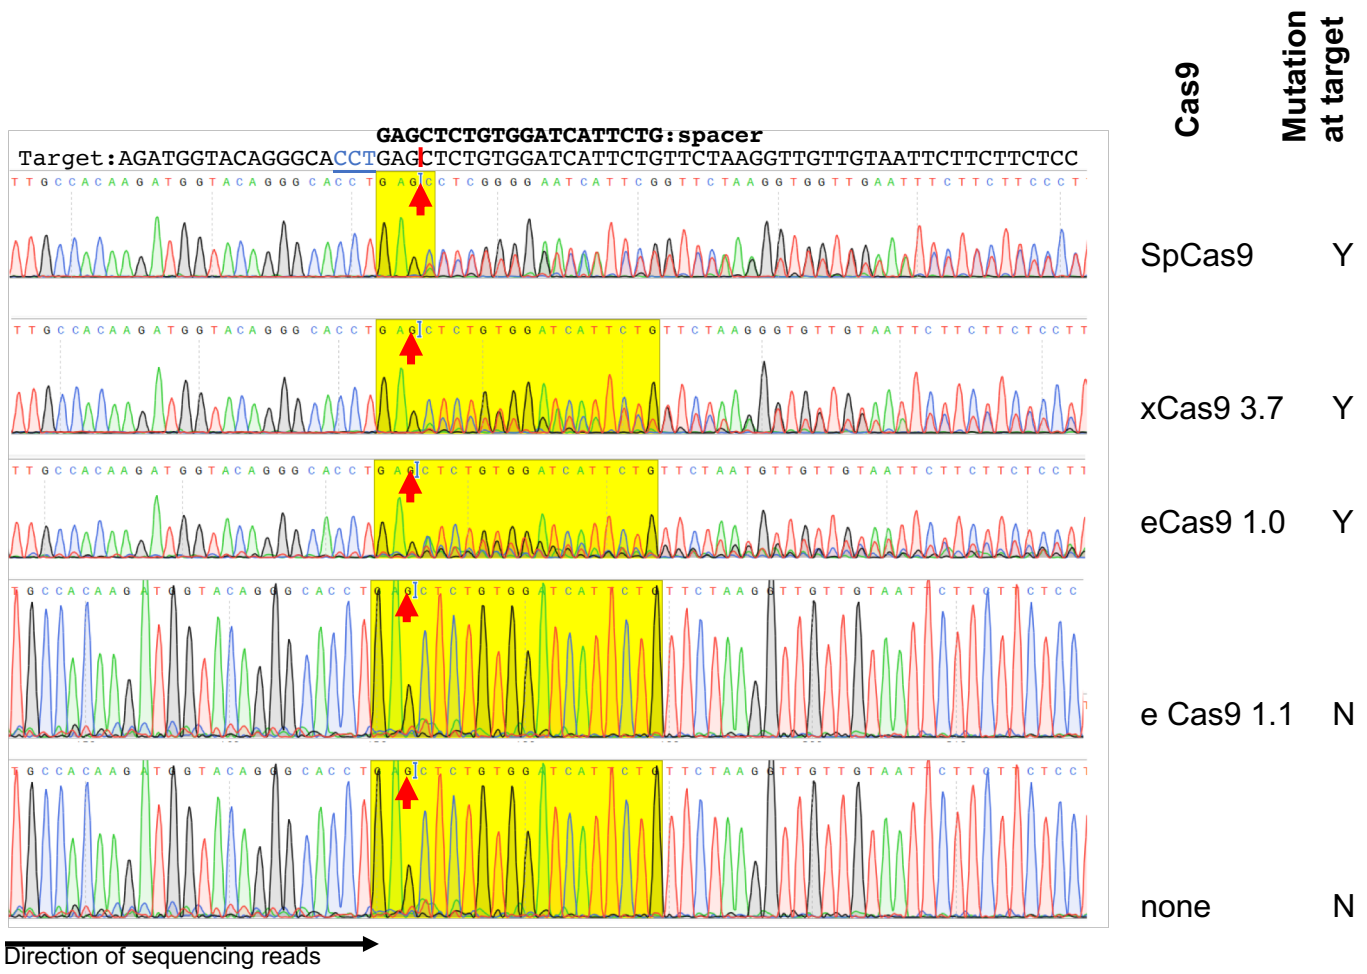

AT1G53510

Target: CAAGATGGTATAGAGACCTGAGCTCTGTGGATCATTCTTTTCGAAGGTAGGTGTTACTGTGGA  
**GAGCTCTGTGGATCATTCTG: spacer**

Cas9  
 Mutation  
 at target

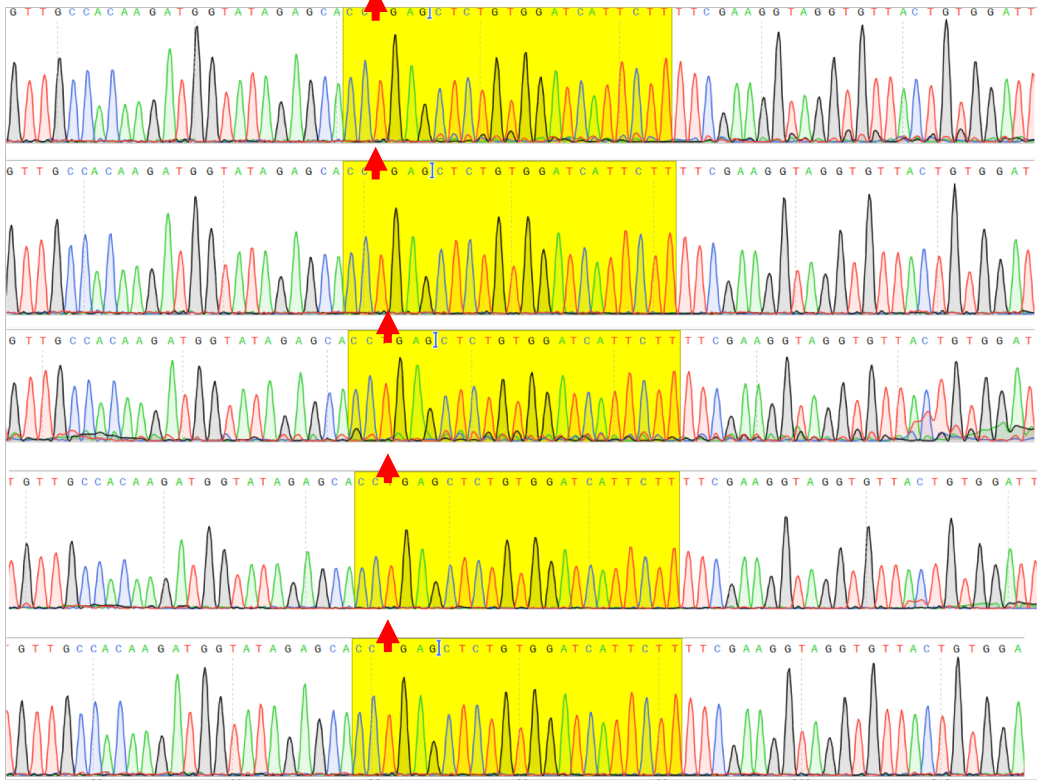

SpCas9 Y

xCas9 3.7 N

eCas9 1.0 Y

eCas9 1.1 N

none N

Direction of sequencing reads →

**AT5G16540**

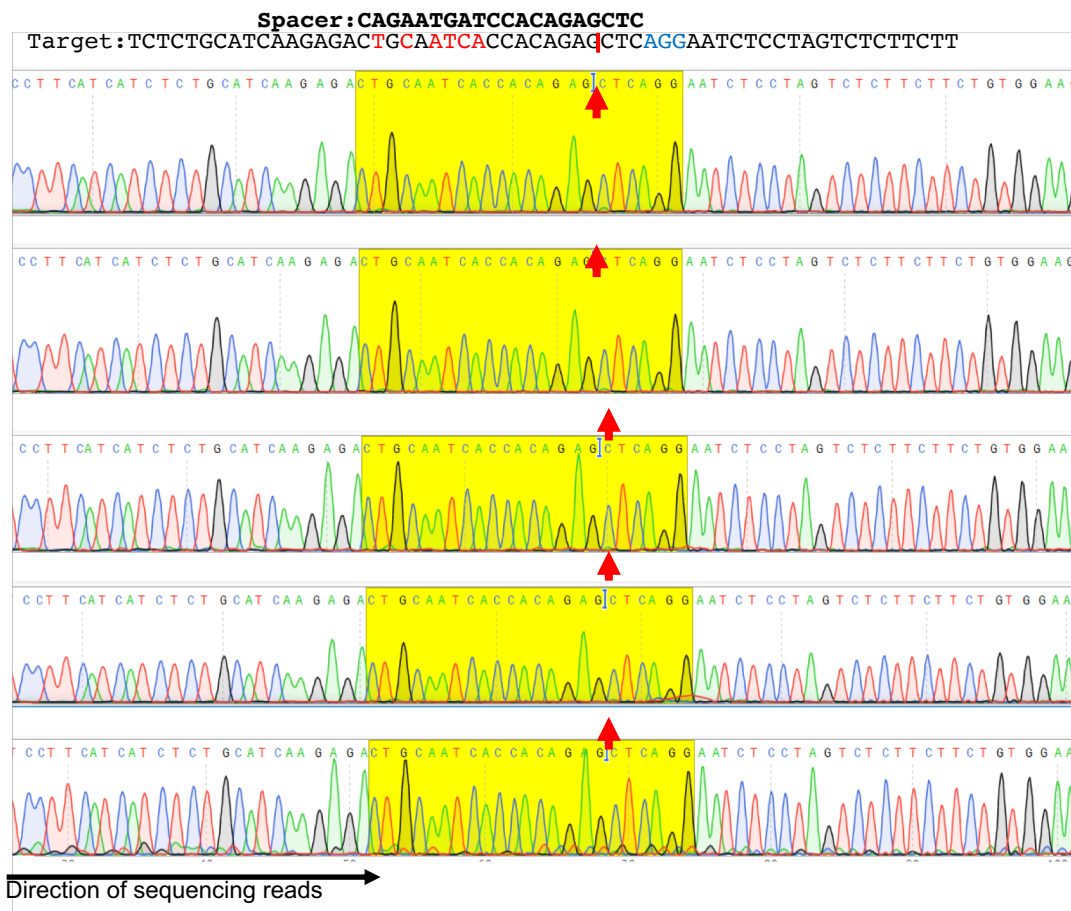

**Cas9**  
**Mutation at target**

SpCas9 N  
 xCas9 3.7 N  
 eCas9 1.0 N  
 e Cas9 1.1 N  
 none N

AT5G10620

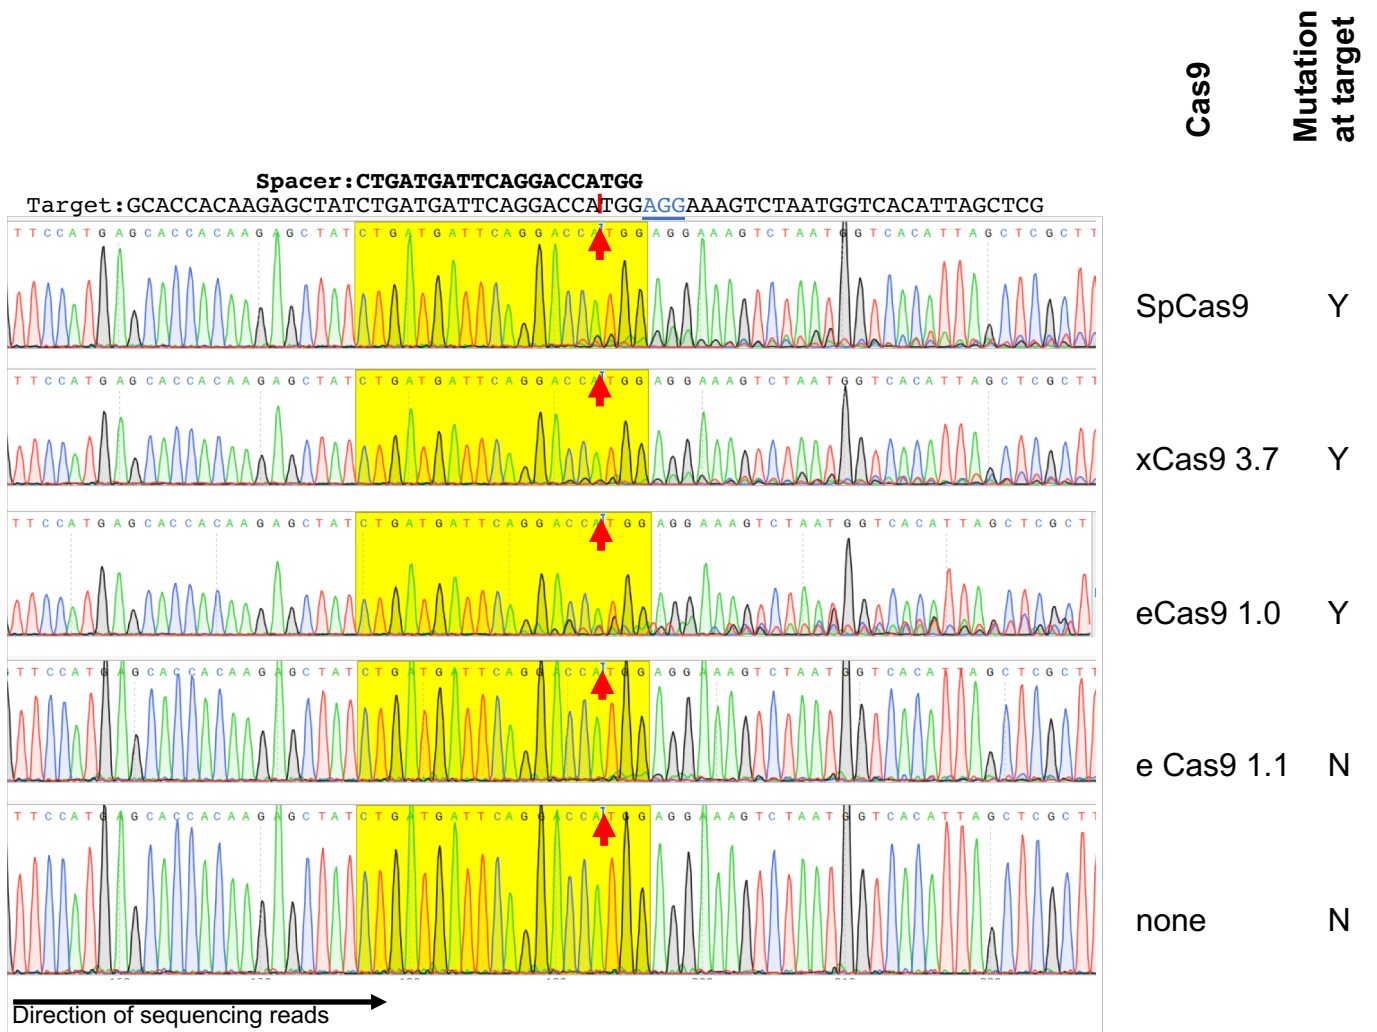



AT5G10605

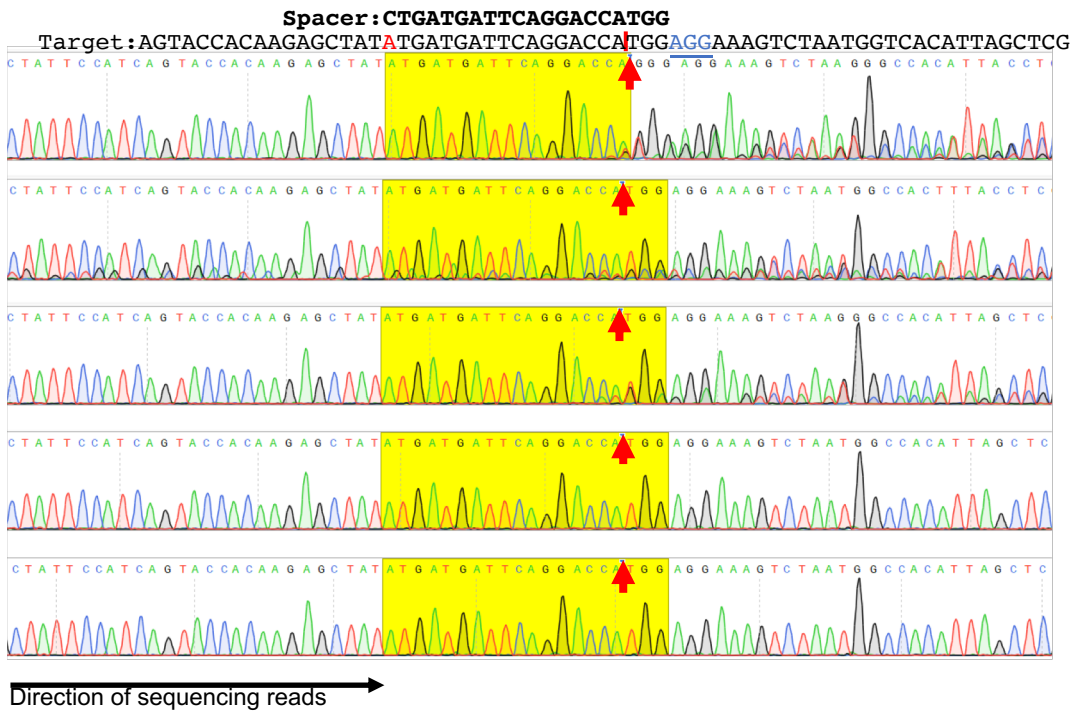

| Cas9       | Mutation at target |
|------------|--------------------|
| SpCas9     | Y                  |
| xCas9 3.7  | Y                  |
| eCas9 1.0  | Y                  |
| e Cas9 1.1 | N                  |
| none       | N                  |

AT1G22130

Spacer : **CTGATGATTCAGGACCATGG**  
 Target : GGAGATACGAACCGGATCCAATAAGATTACGACCA**TGG**AGGAATACGAAGTTTCTGAGAAG

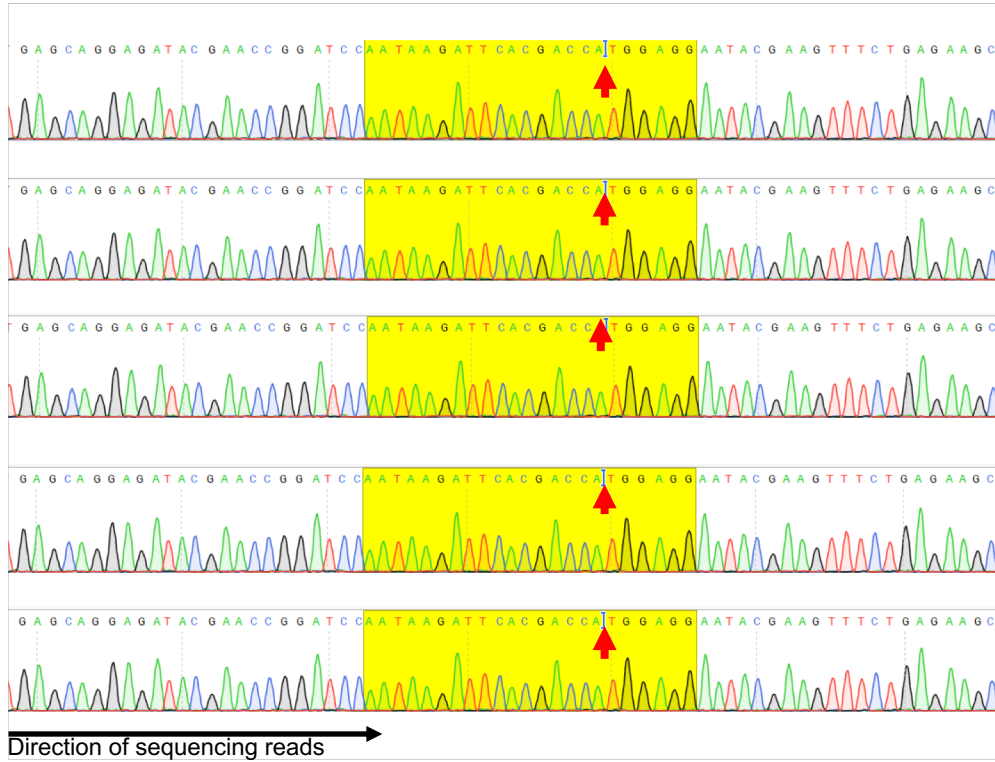

| Cas9      | Mutation at target |
|-----------|--------------------|
| SpCas9    | N                  |
| xCas9 3.7 | N                  |
| eCas9 1.0 | N                  |
| eCas9 1.1 | N                  |
| none      | N                  |

AT5G19360

Cas9  
Mutation  
at target

Spacer : CCATACTTGCCATTCCATGG

Target : GACGATTGTCAGATTATCCATACTTGCCATTCCATGGGGTTATCCACAGGGACTTCAAGCCTGAGAACT

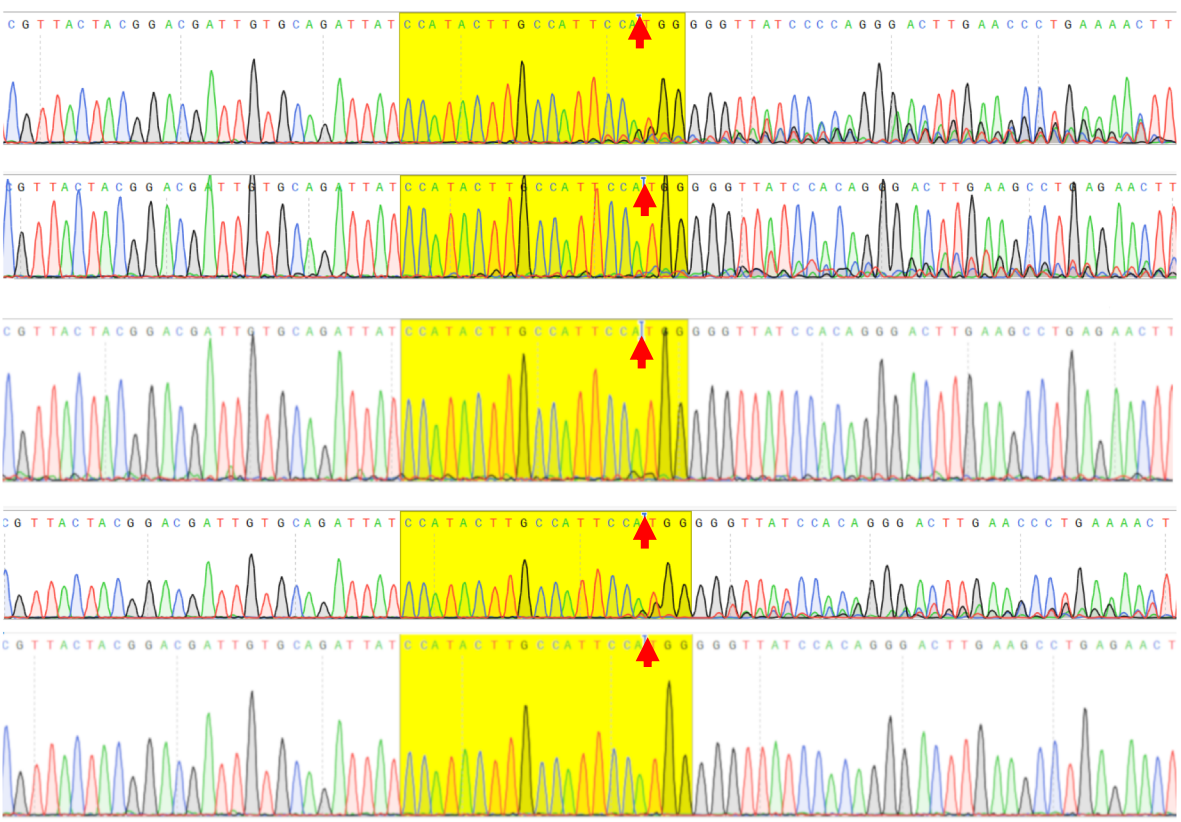

SpCas9 Y

xCas9 3.7 Y

eCas9 1.0 Y

eCas9 1.1 Y

none N

Direction of sequencing reads  
→

AT5G12180

Cas9  
Mutation  
at target

Spacer: CCATACTTGCCATTCCATGG

Target: GAACGATTGTTTCAGATTGTGCATACTTGCCATTCCATGGGGTGATTTCACAGGGATTGAAGCCAGAGAAGTT

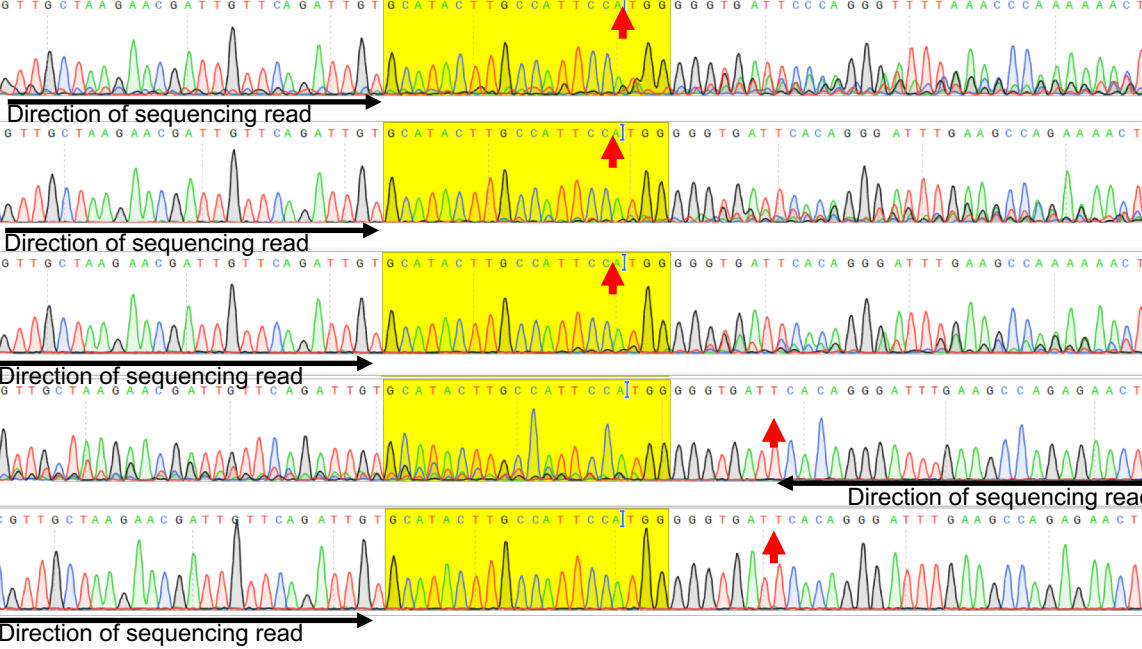

|            |   |
|------------|---|
| SpCas9     | Y |
| xCas9 3.7  | Y |
| eCas9 1.0  | Y |
| e Cas9 1.1 | Y |
| none       | N |

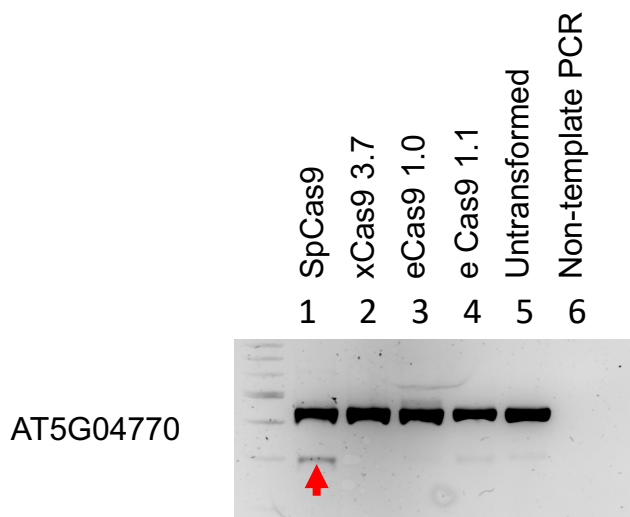

Spacer: GTCGAGACGACTAGCACGGC  
 AT5G04770: GTCGAGACGACTAGCACGGCCGG  
 AT3G10600: GTAGAGACGACTAGCACGGCCGG

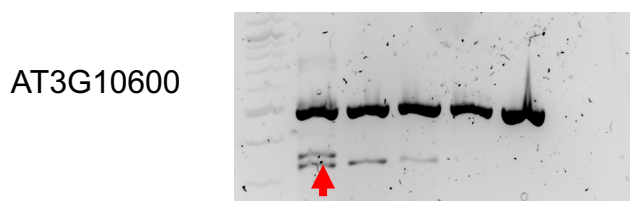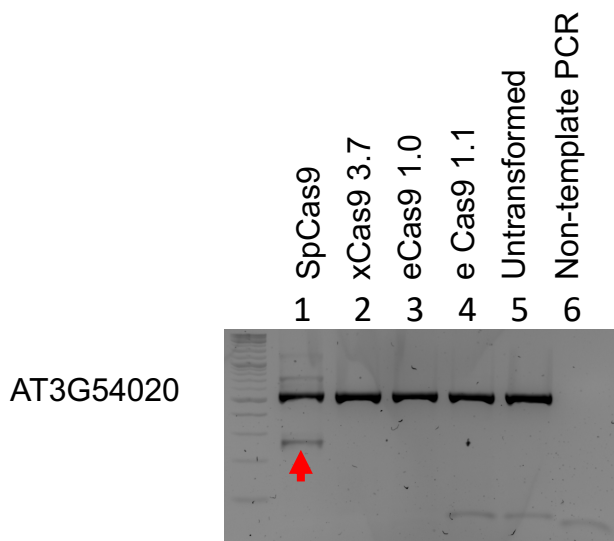

Spacer: CGACAGTGATAGTTAGGGCC  
 AT3G54020: CGACAGTGATAGTTAGGGCCAGG  
 AT2G37940: CGGAGTGATAGTTAGGGCCAGG

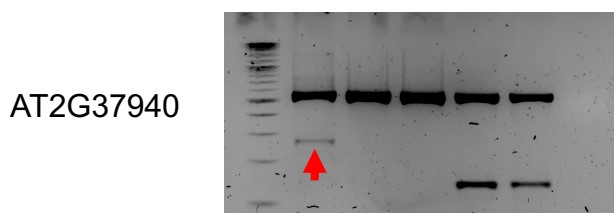

AT5G04160

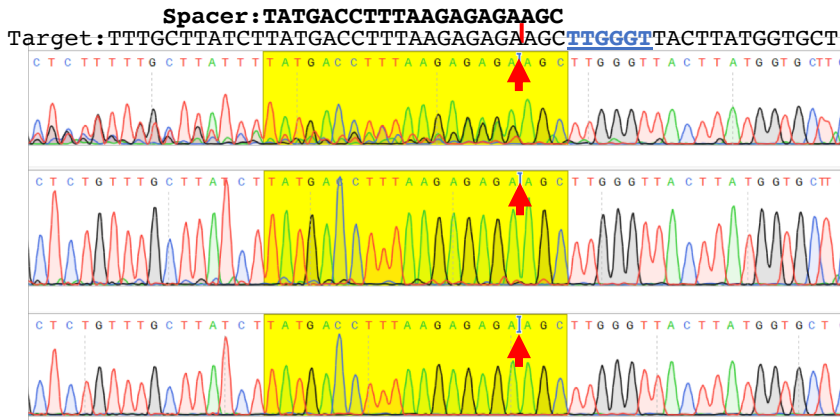

| Cas9    | Mutation at target |
|---------|--------------------|
| SaCas9  | Y                  |
| eSaCas9 | N                  |
| none    | N                  |

← Direction of sequencing read

# AT3G10290

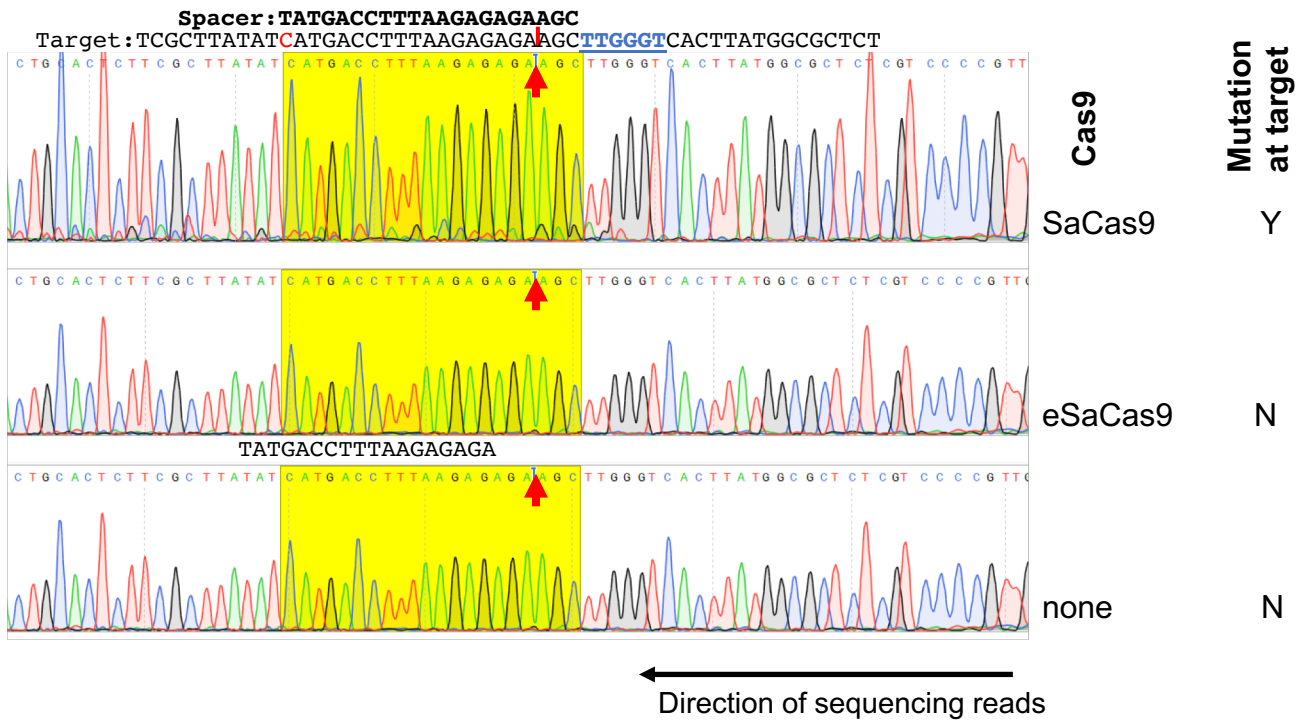



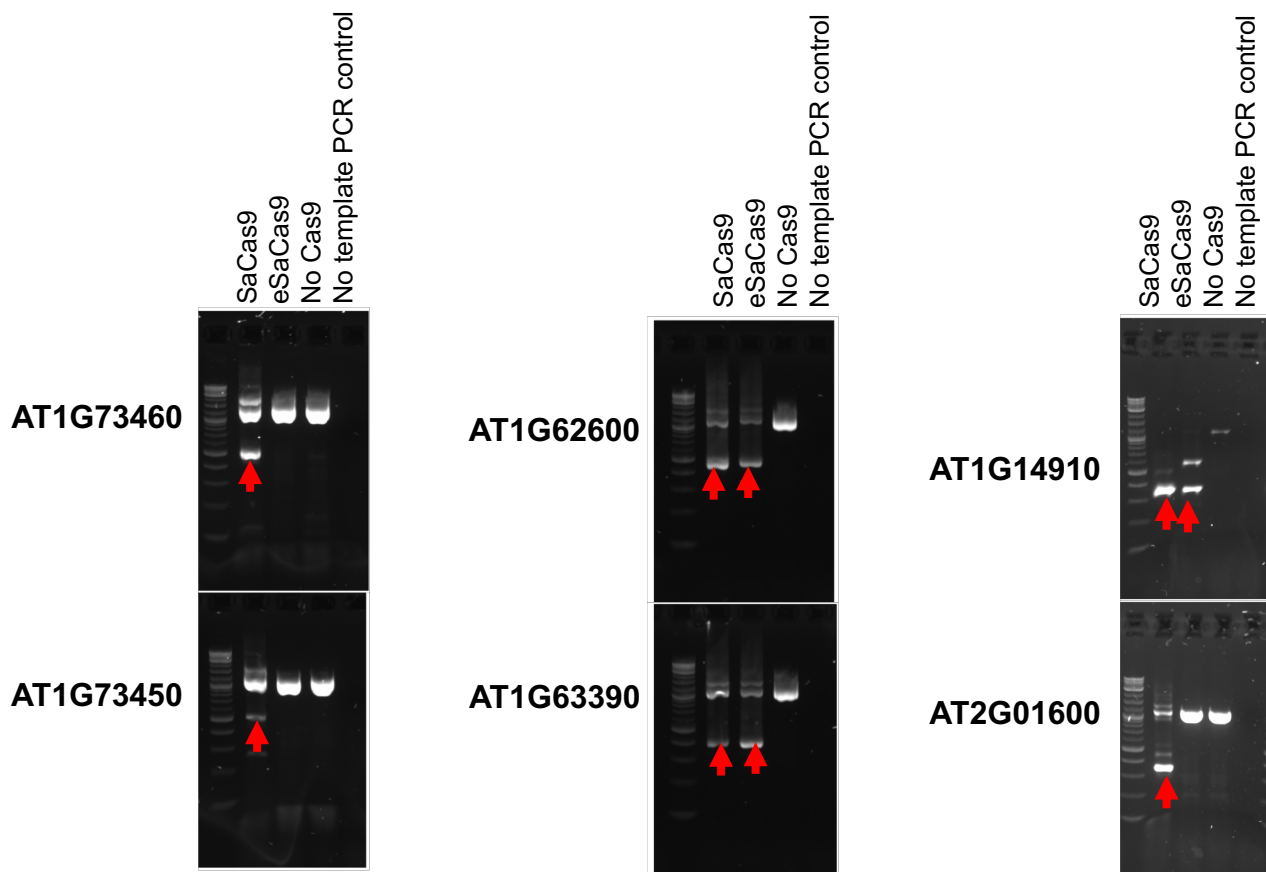

Spacer: TTCATGGTGATCAGGACTTCC  
 AT1G73460: TTCATGGTGATCAGGACTTCCACGGGT  
 AT1G73450: **A**TTCATGGTGATCAGGACTTCCACGGGT

Spacer: GACGCTCGAATGAACAACGGA  
 AT1G62600: GACGCTCGAATGAACAACGGATCGGGT  
 AT1G63390: **A**ACGCTCGAATGAACAACGGATCGGGT

Spacer: GCCCTTGAAATATAACAAGCGT  
 AT1G14910: GCCCTTGAAATATAACAAGCGTGCGGGT  
 AT2G01600: **T**CCCTTGAAATATAACAAGCGTGCGGGT
